# Supplementary material for: Decoding Spontaneous Emotional States in the Human Brain
Source: PLoS Biol. 2016 Sep 14;14(9):e2000106. doi: 10.1371/journal.pbio.2000106 (PMC5023171; doi:10.1371/journal.pbio.2000106)
Supplement: S1 Table — (XLSX) [file pbio.2000106.s005.xlsx]

## Sheet: Sheet1
Classification Model	Source	SS	df	MS	χ2	Prob > χ2
Content	Time	20700000	255	80980.6	3766.43	0
	Error	677000000	126990	5331.1
	Total	698000000	127743
Amusement	Time	23100000	255	90494.6	4208.92	0
	Error	675000000	126990	5312
	Total	698000000	127743
Surprise	Time	6060000	255	23774.5	1105.76	0
	Error	692000000	126990	5445.9
	Total	698000000	127743
Fear	Time	20100000	255	78656	3658.31	0
	Error	678000000	126990	5335.73
	Total	698000000	127743
Anger	Time	9890000	255	38802.6	1804.72	0
	Error	688000000	126990	5415.8
	Total	698000000	127743
Sad	Time	46800000	255	183492	8534.24	0
	Error	651000000	126990	5125.2
	Total	698000000	127743
Neutral	Time	19300000	255	75639.1	3517.99	0
	Error	678000000	126990	5341.8
	Total	698000000	127743
